# Supplementary material for: Unbalanced emission reductions of different species and sectors in China during COVID-19 lockdown derived by multi-species surface observation assimilation
Source: Copernicus journal article supplement (doi:10.5194/acp-2022-729), 2023-01-03
Supplement: Supplementary file 1 [file acp-2022-729-supplement.pdf]

# Supplementary Material

## Text S1: Evaluation of meteorological simulation

Performance of meteorological simulation is important for the inversion estimation since the meteorological parameters determine the transport process from the sources to the observation and influence the estimation of flow-dependent background error covariance. The air temperature, relative humidity and precipitation also affect the atmospheric chemistry and the removal of air pollutants. The meteorology simulation was evaluated against the daily observations from China Meteorological Administration (CMA) with spatial distribution of meteorological observation sites shown in Fig. S10. Figure S11–16 present the comparisons of simulated and observed regional mean daily meteorological parameters (i.e., u-wind, v-wind, temperature, relatively humidity and precipitation) over six regions of China from January to February 2020, with calculated evaluation statistics summarised in Table S4. In general, the simulation can well capture the main features of the observed meteorological conditions in all regions for our simulation period. All variables exhibited small RMSE values in all regions, that are around 1 m/s for wind speed, 1°C for T, 10% for RH and 0.08–2.38mm for precipitation. Therefore, the WRF can generally well reproduce the meteorological conditions for all regions of China, which is adequate for our inversion estimates.

## Figures

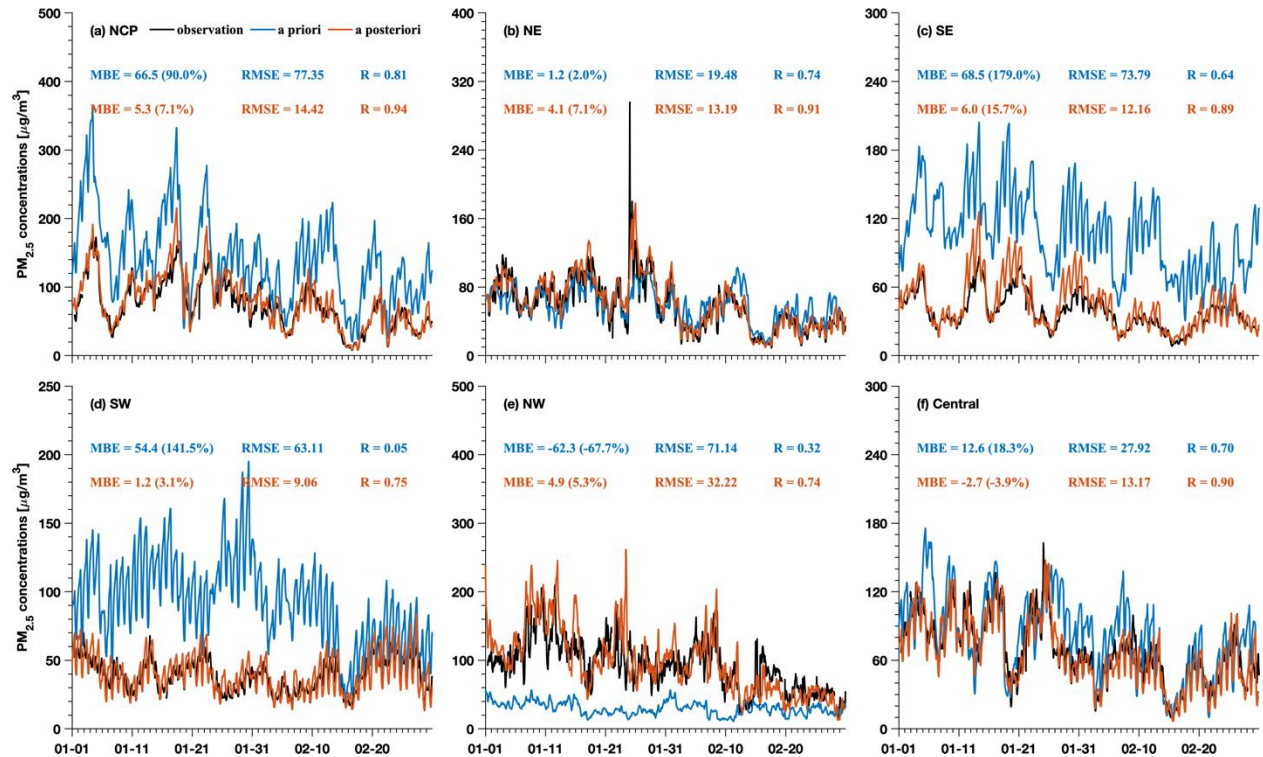

Figure S1: Time series of PM<sub>2.5</sub> concentrations over (a) NCP, (b) NE, (c) SE, (d) SW, (e) NW and (f) Central regions from 1st Jan to 29th Feb 2020 obtained from observation (black line) and simulation using a priori (blue line) and a posteriori (orange line) emissions.

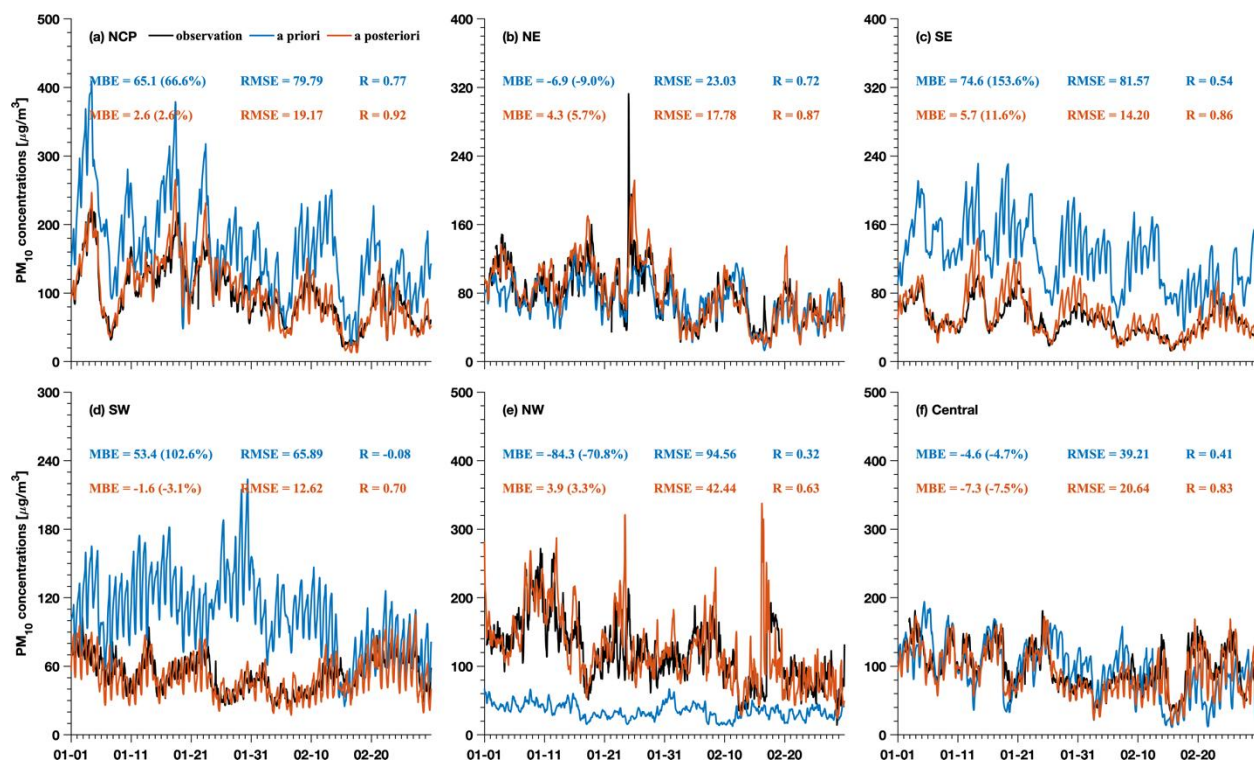

Figure S2: Same as in Fig. S1 but for  $PM_{10}$  concentrations.

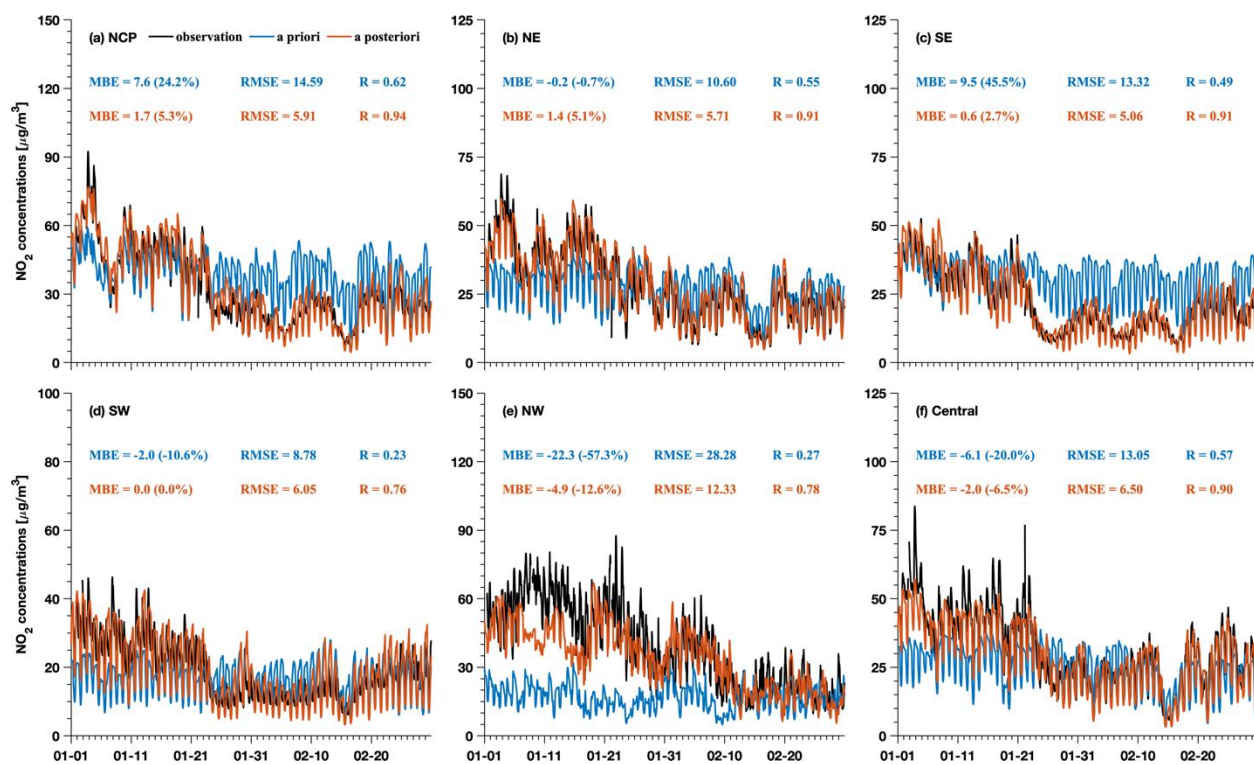

Figure S3: Same as in Fig. S1 but for  $NO_2$  concentrations.

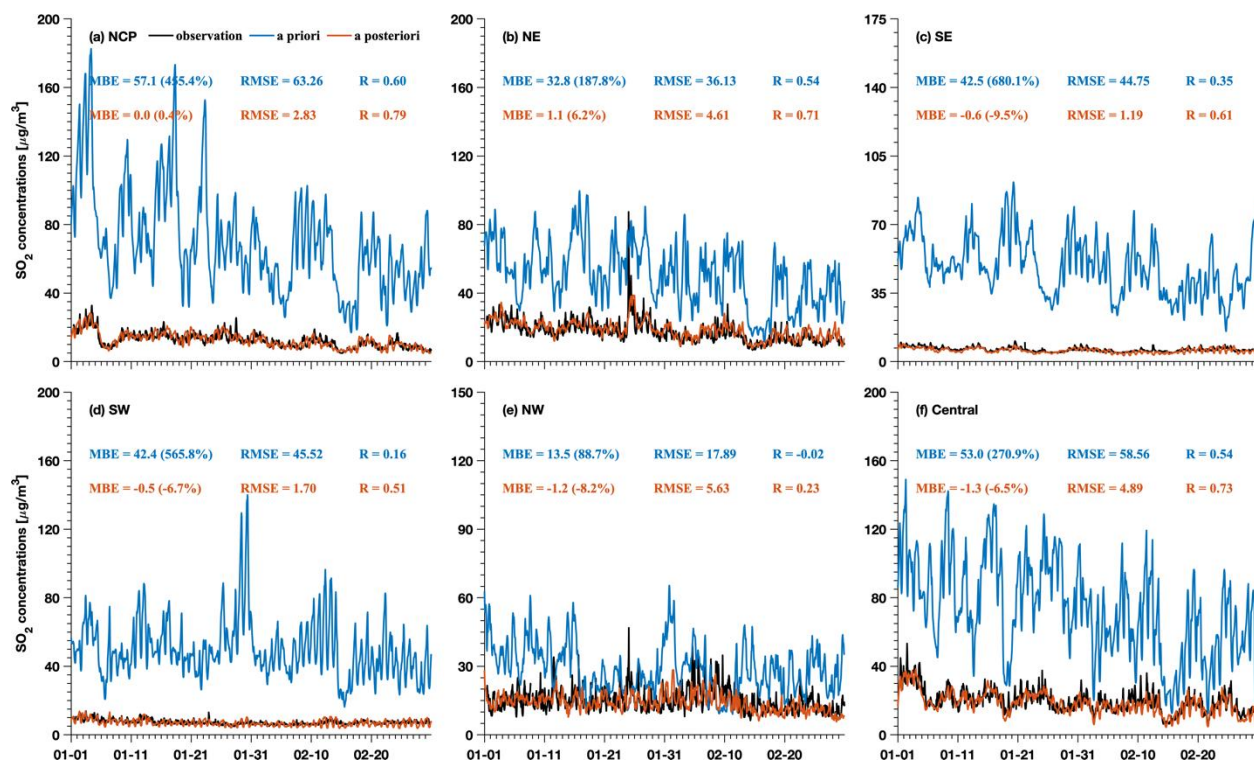

Figure S4: Same as in Fig. S1 but for  $\text{SO}_2$  concentrations.

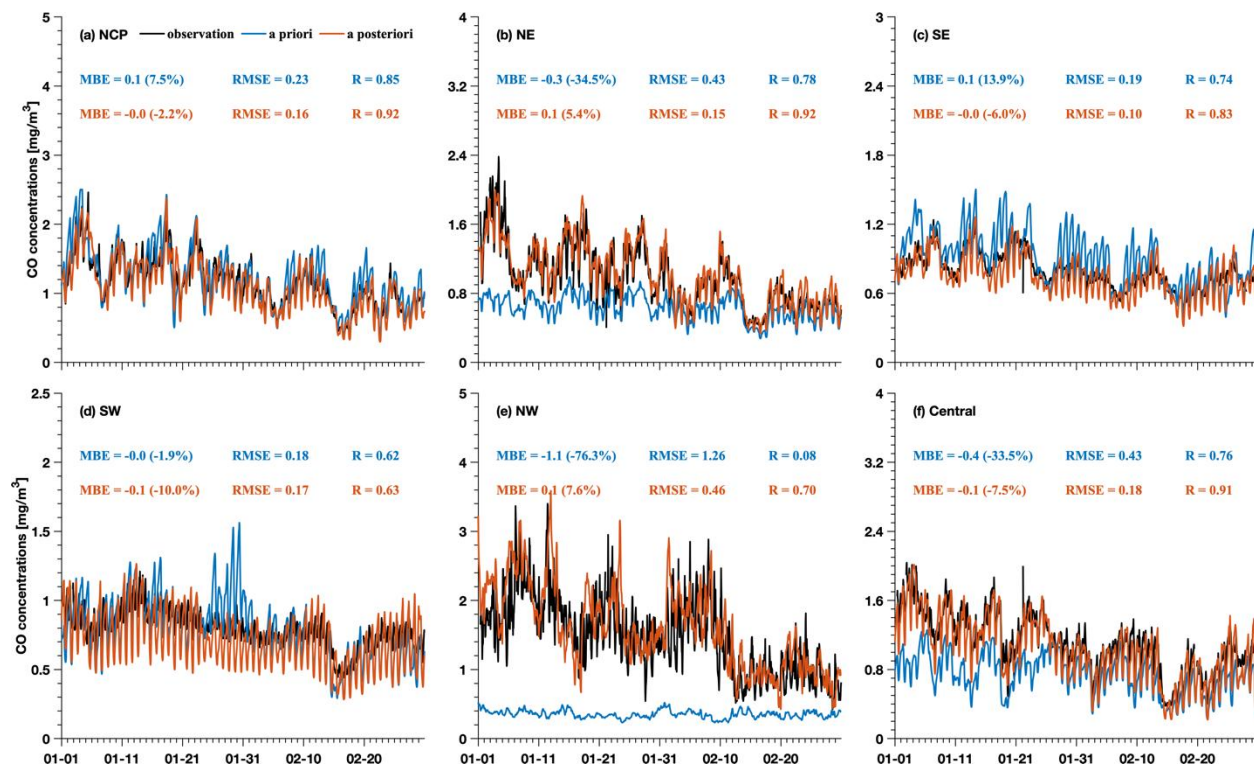

Figure S5: Same as in Fig. S1 but for  $\text{CO}$  concentrations.



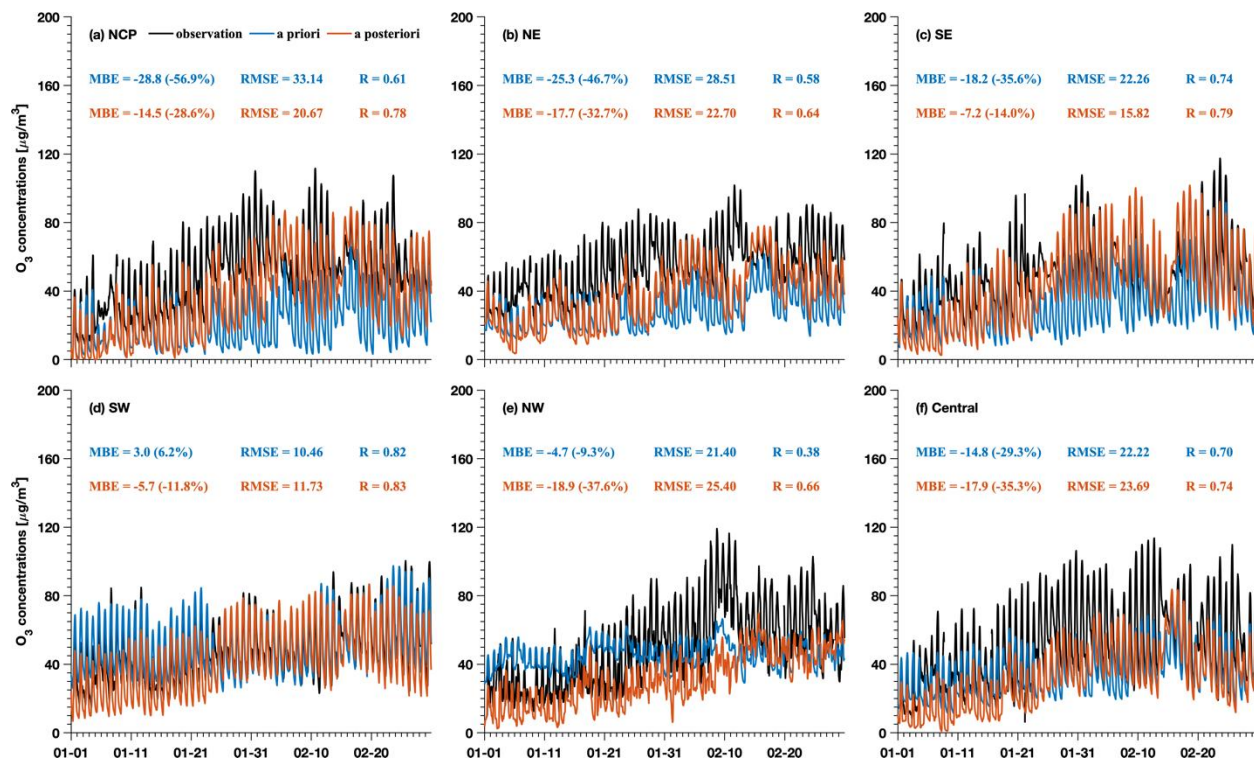

Figure S6: Same as in Fig. S1 but for  $O_3$  concentrations.

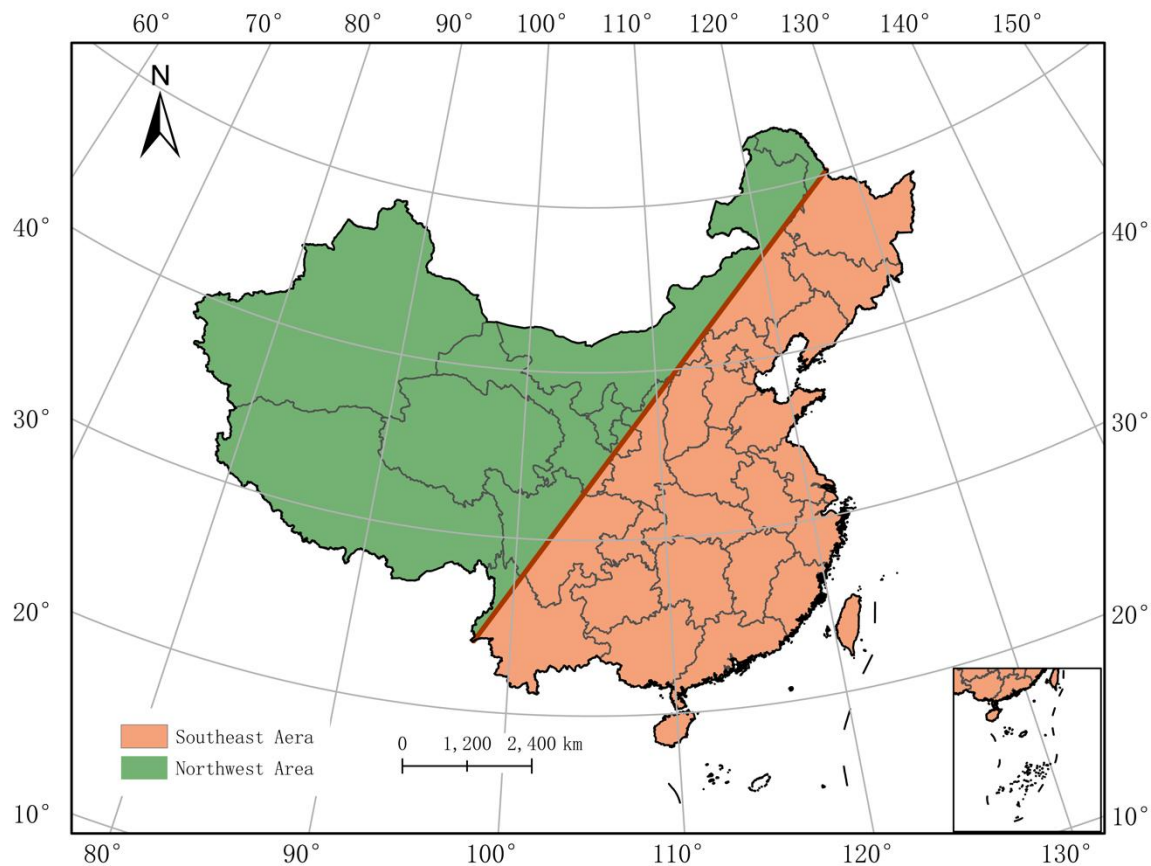

**Figure S7: Geographical definition of southeast China (orange part) and northwest (green part) based on the Hu Huanyong Line. This line divides the China based on the population with population in east of this line (southeast China) accounts for 86.72% of the total population in China.**

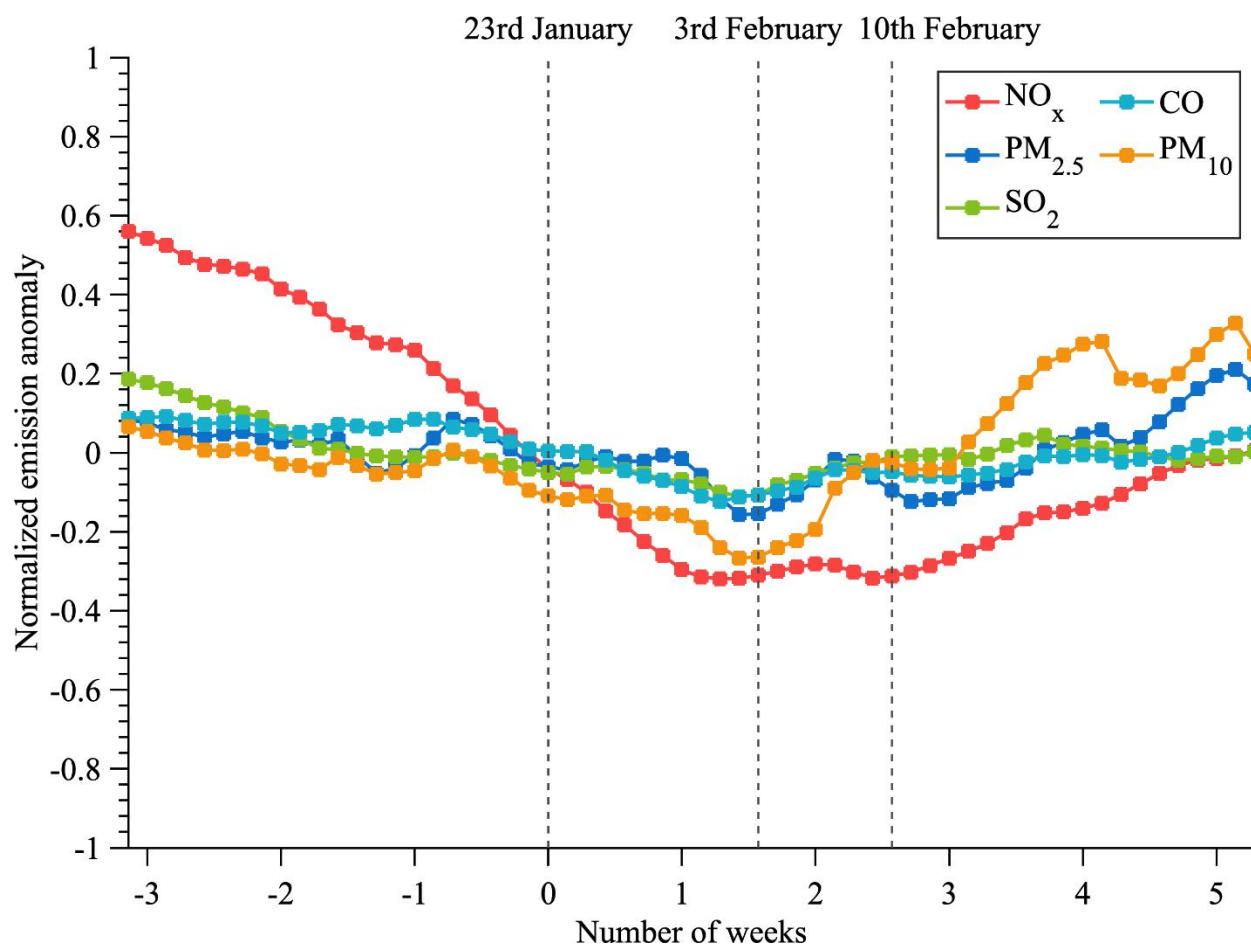

Figure S8: Time series of normalized emission anomaly estimated by inversion results for different species in southeast China (defined in Figure S4) from 1st January to 29th February 2020. The normalized emission anomaly is calculated by the emission anomaly divided by the averaged emission during the whole period.

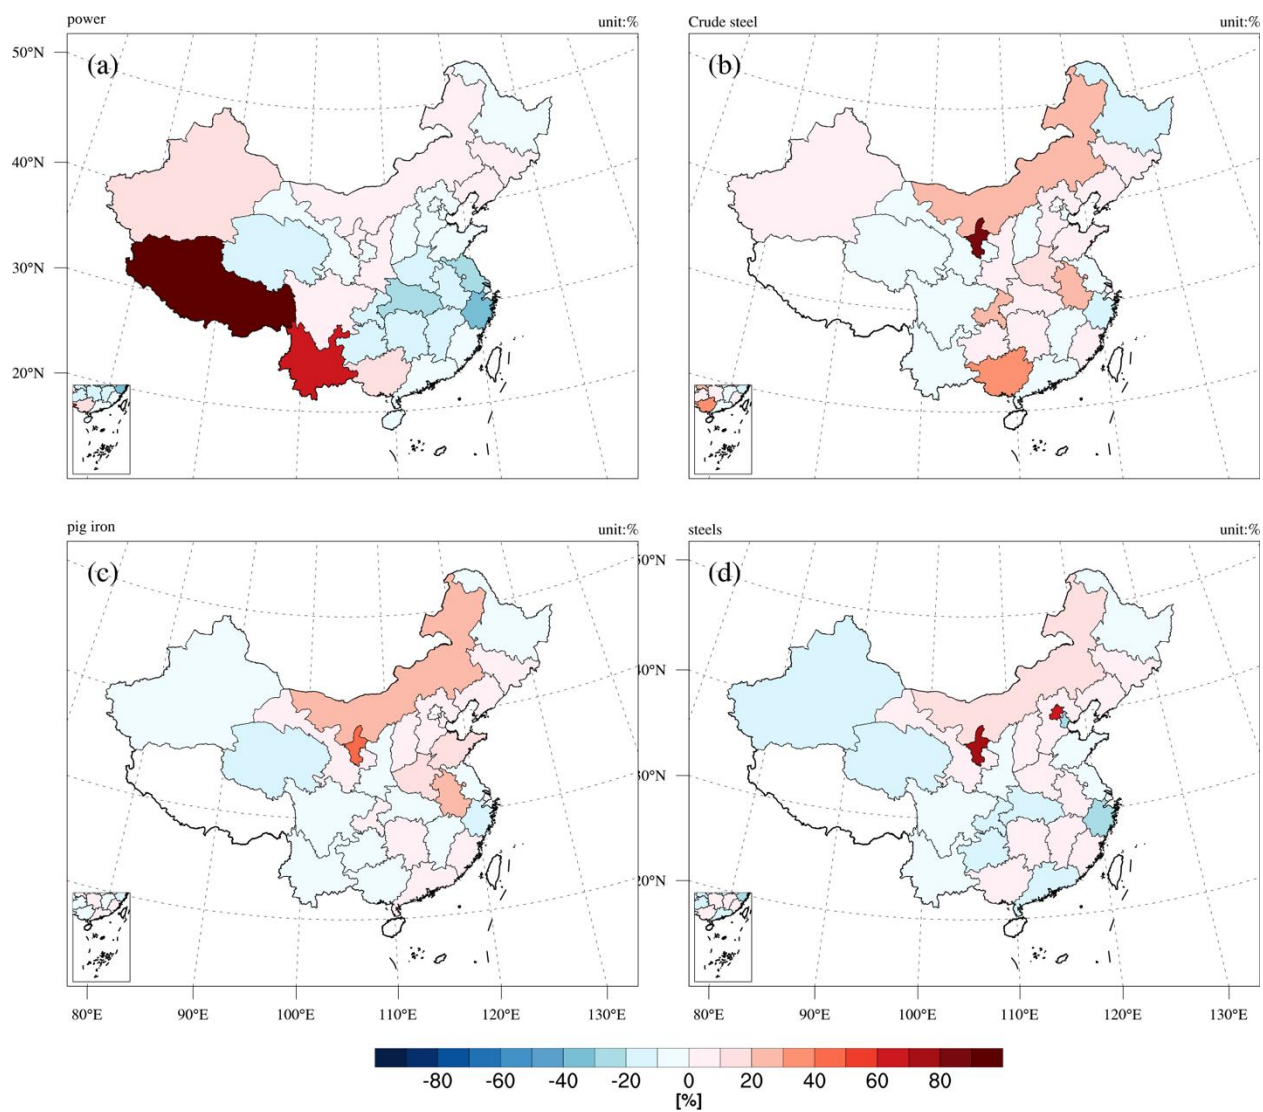

**Figure S9: Changes in (a) thermal power generation, productions of (b) crude steel, (c) pig iron, and (d) steels in China in the first two months of 2020 compared to those in 2019.**

49

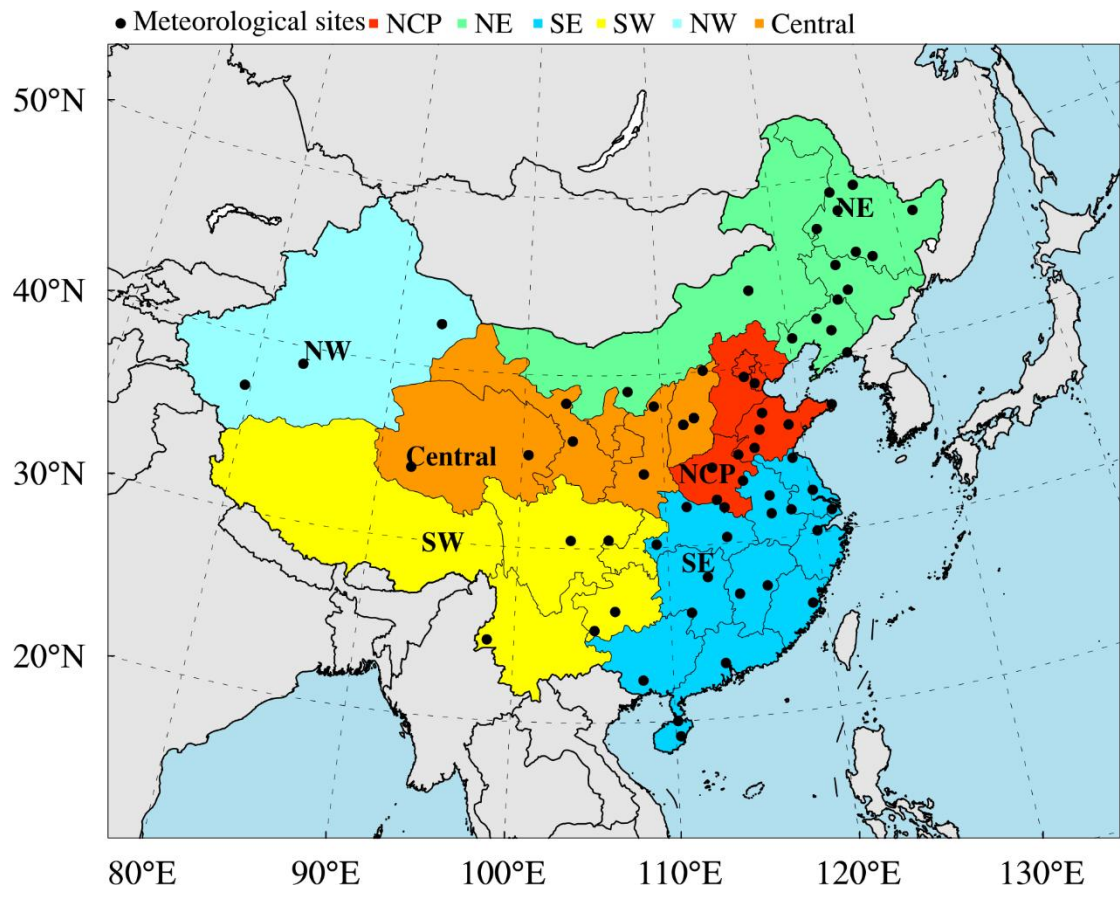

50

51 **Figure S10: Spatial distribution of meteorological observation sites used in the evaluation of meteorology simulations over different regions**  
52 **of mainland China.**

53



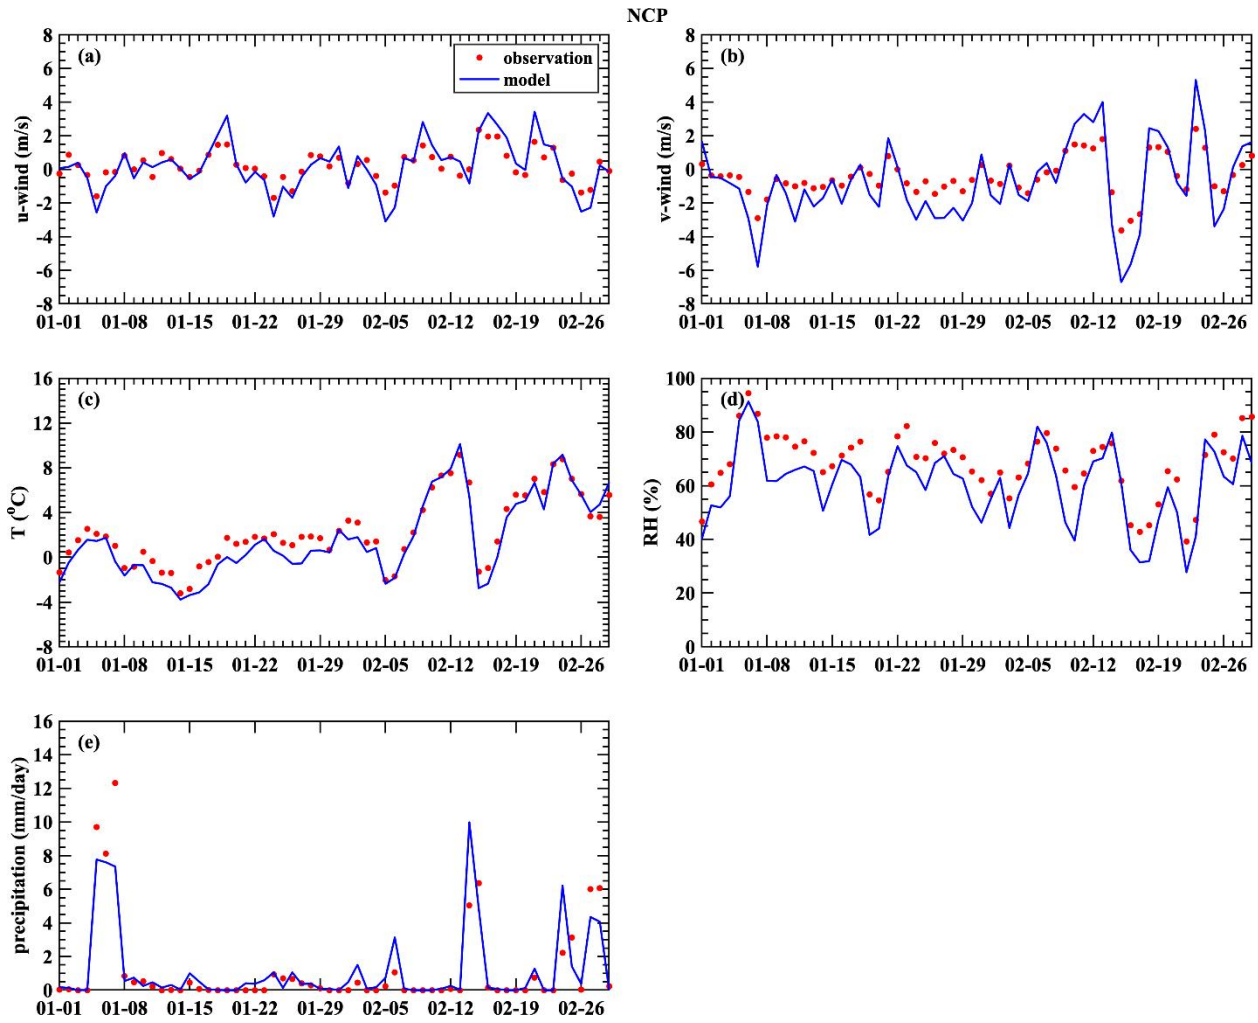

Figure S11: Timeseries of observed (red dots) and simulated (blue line) values of (a) u-wind, (b) v-wind, (c) temperature, (d) relative humidity and (e) precipitation over NCP region from 1st Jan 2020 to 29th Feb 2020.

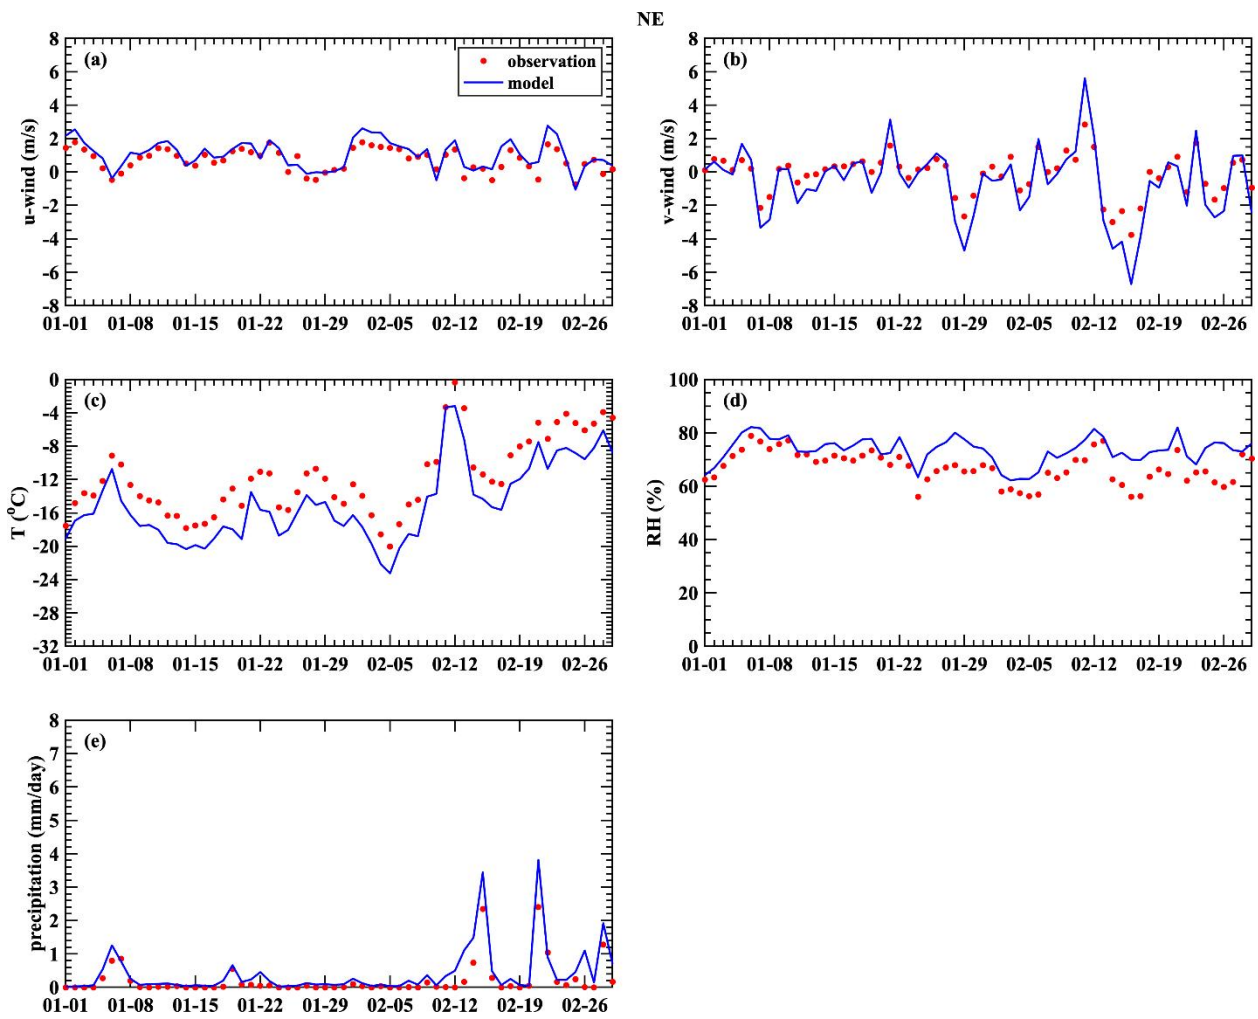

Figure S12: Same as in Figure S11 but over the NE region.

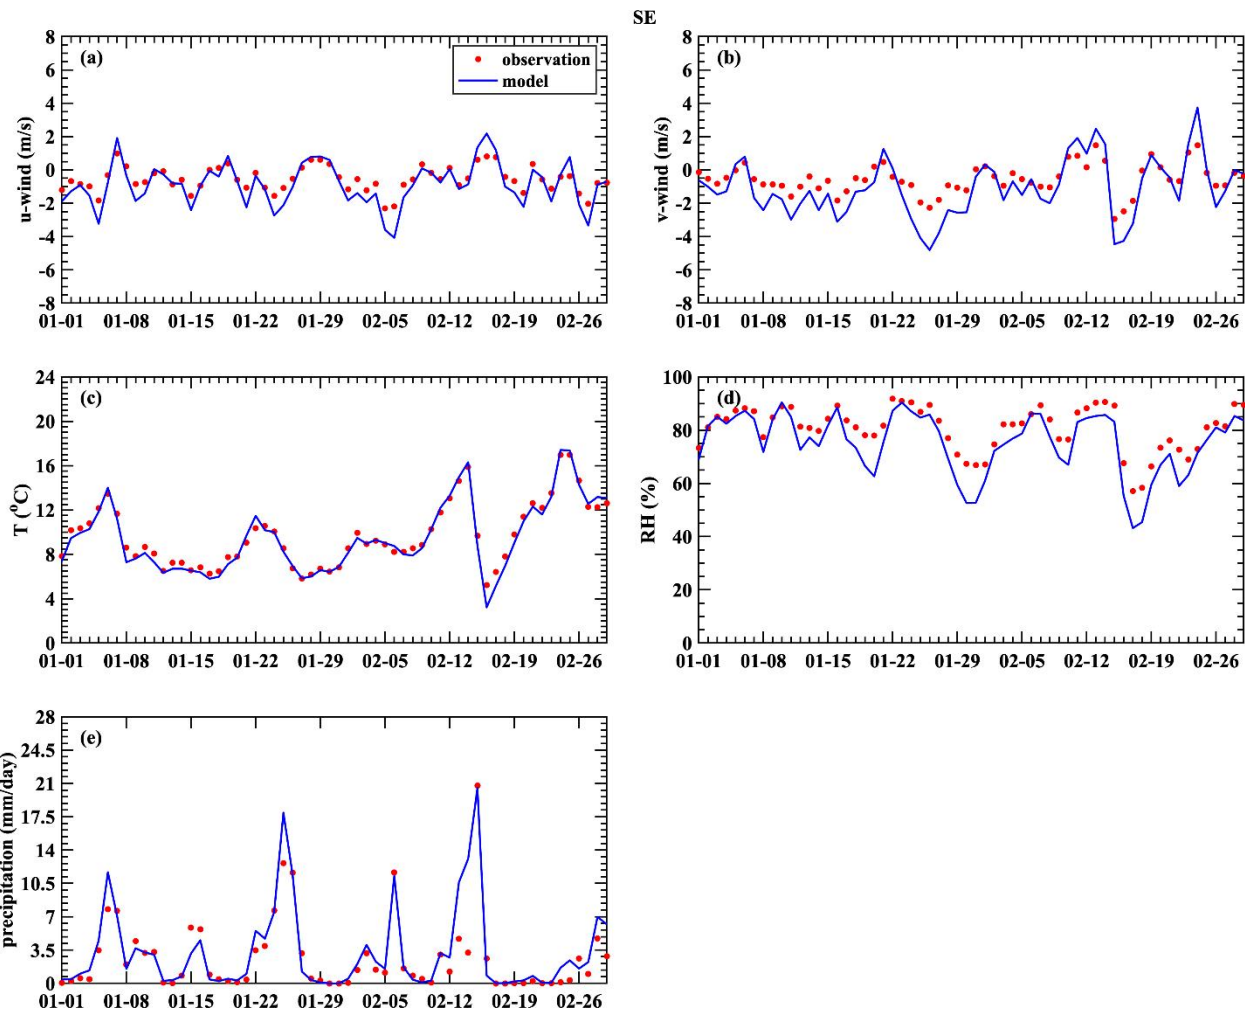

SE

Figure S13: Same as in Figure S11 but over the SE region.

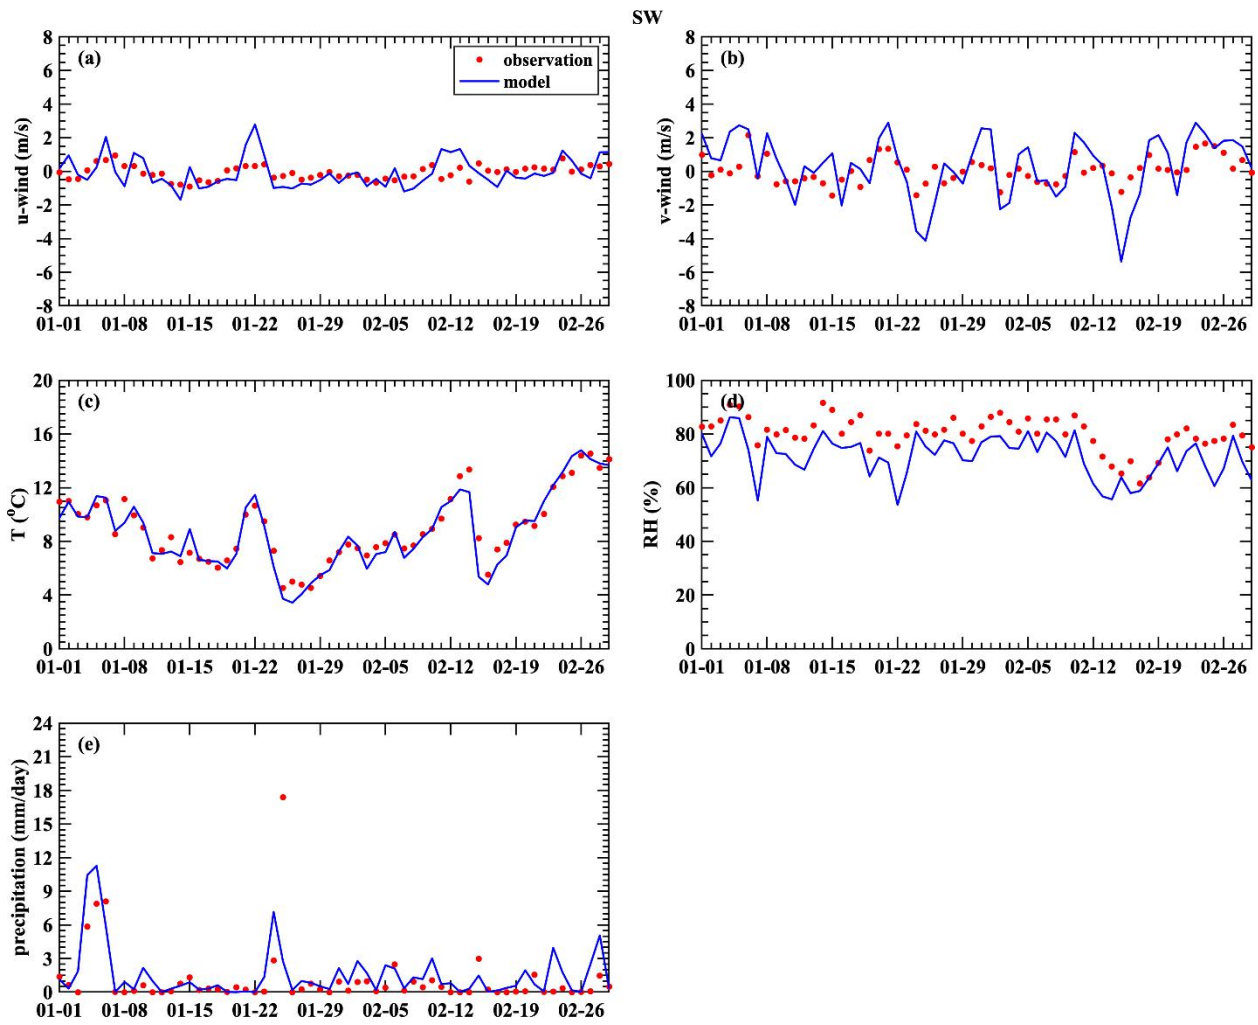

Figure S14: Same as in Figure S11 but over the SW region.



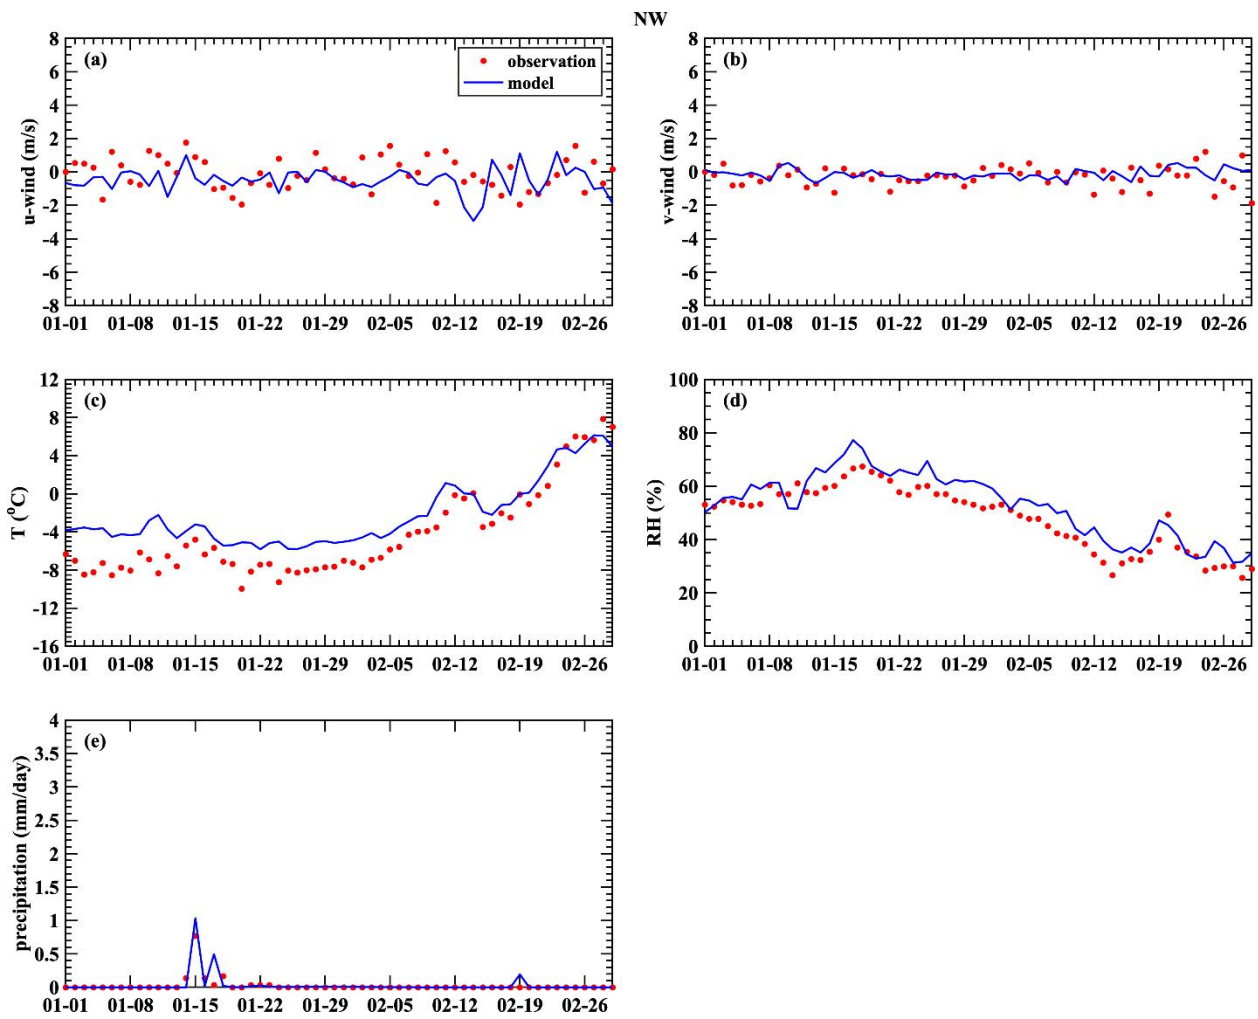

Figure S15: Same as in Figure S11 but over the NW region.

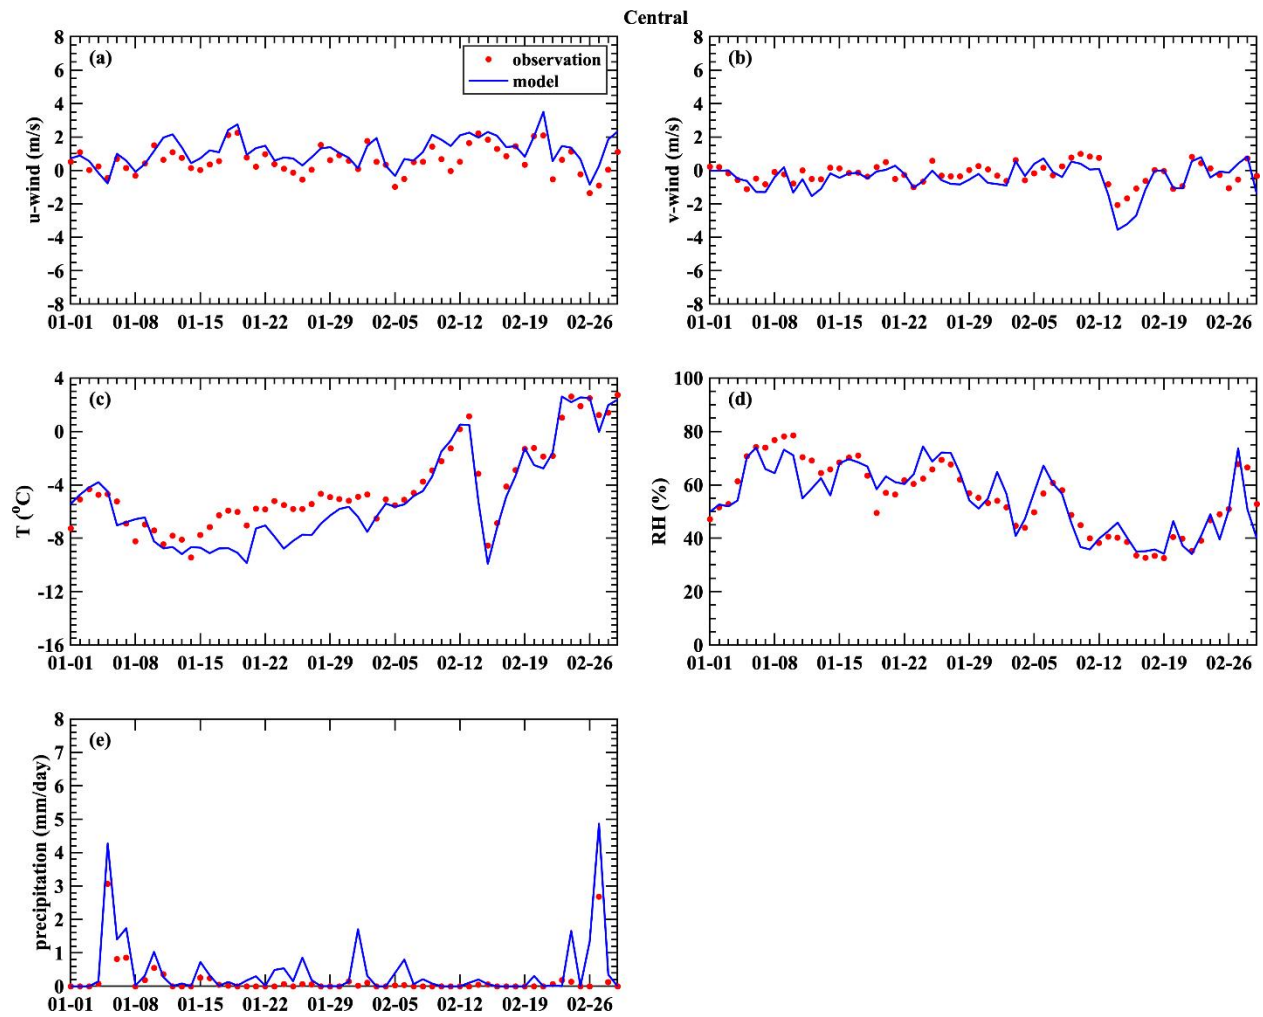

Figure S16: Same as in Figure S11 but over the Central region.

79 **Table S1: Evaluation statistics of cross-validation run (outside of bracket) and a priori simulation (inside bracket)**

|         | PM <sub>2.5</sub> (µg/m <sup>3</sup> ) |               |               |             | PM <sub>10</sub> (µg/m <sup>3</sup> ) |               |               |             |
|---------|----------------------------------------|---------------|---------------|-------------|---------------------------------------|---------------|---------------|-------------|
|         | R                                      | MBE           | NMB(%)        | RMSE        | R                                     | MBE           | NMB (%)       | RMSE        |
| NCP     | 0.94 (0.81)                            | 5.3 (66.5)    | 7.1 (90.0)    | 14.4 (77.4) | 0.92 (0.77)                           | 2.6 (65.1)    | 2.6 (66.6)    | 19.2 (79.8) |
| NE      | 0.91 (0.74)                            | 4.1 (1.2)     | 7.1 (2.0)     | 13.2 (19.5) | 0.87 (0.72)                           | 4.3 (-6.9)    | 5.7 (-9.0)    | 17.8 (23.0) |
| SE      | 0.89 (0.64)                            | 6.0 (68.5)    | 15.7 (179.0)  | 12.2 (73.8) | 0.86 (0.54)                           | 5.7 (74.6)    | 11.6 (153.6)  | 14.2 (81.6) |
| SW      | 0.75 (0.05)                            | 1.2 (54.4)    | 3.1 (141.5)   | 9.1 (63.1)  | 0.70 (-0.08)                          | -1.6 (53.4)   | -3.1 (102.6)  | 12.6 (65.9) |
| NW      | 0.74 (0.32)                            | 4.9 (-62.3)   | 5.3 (-67.7)   | 32.2 (71.1) | 0.63 (0.32)                           | 3.9 (-84.3)   | 3.3 (-70.8)   | 42.4 (94.6) |
| Central | 0.90 (0.70)                            | -2.7 (12.6)   | -3.9 (18.3)   | 13.2 (27.9) | 0.83 (0.41)                           | -7.3 (-4.6)   | -7.5 (-4.7)   | 20.6 (39.2) |
|         | NO <sub>2</sub> (µg/m <sup>3</sup> )   |               |               |             | SO <sub>2</sub> (µg/m <sup>3</sup> )  |               |               |             |
|         | R                                      | MBE           | NMB(%)        | RMSE        | R                                     | MBE           | NMB (%)       | RMSE        |
| NCP     | 0.94 (0.62)                            | 1.7 (7.6)     | 5.3 (24.2)    | 5.9 (14.6)  | 0.79 (0.60)                           | 0.0 (57.1)    | 0.4 (455.4)   | 2.8 (63.3)  |
| NE      | 0.91 (0.55)                            | 1.4 (-0.2)    | 5.1 (-0.7)    | 5.7 (10.6)  | 0.71 (0.54)                           | 1.1 (32.8)    | 6.2 (187.8)   | 4.6 (36.1)  |
| SE      | 0.91 (0.49)                            | 0.6 (9.5)     | 2.7 (45.5)    | 5.1 (13.3)  | 0.61 (0.35)                           | -0.6 (42.5)   | -9.5 (680.1)  | 1.2 (44.7)  |
| SW      | 0.76 (0.23)                            | 0.0 (-2.0)    | 0.0 (-10.6)   | 6.1 (8.8)   | 0.51 (0.16)                           | -0.5 (42.4)   | -6.7 (565.8)  | 1.7 (45.5)  |
| NW      | 0.78 (0.27)                            | -4.9 (-22.3)  | -12.6 (-57.3) | 12.3 (28.3) | 0.23 (-0.02)                          | -1.2 (13.5)   | -8.2 (88.7)   | 5.6 (17.9)  |
| Central | 0.90 (0.57)                            | -2.0 (-6.1)   | -6.5 (-20.0)  | 6.5 (13.1)  | 0.73 (0.54)                           | -1.3 (53.0)   | -6.5 (270.9)  | 4.9 (58.6)  |
|         | CO (mg/m <sup>3</sup> )                |               |               |             | O <sub>3</sub> (µg/m <sup>3</sup> )   |               |               |             |
|         | R                                      | MBE           | NMB(%)        | RMSE        | R                                     | MBE           | NMB (%)       | RMSE        |
| NCP     | 0.92 (0.85)                            | -0.03 (0.08)  | -2.2 (7.5)    | 0.16 (0.23) | 0.78 (0.61)                           | -14.5 (-28.8) | -28.6 (-56.9) | 20.7 (33.1) |
| NE      | 0.92 (0.78)                            | 0.05 (-0.33)  | 5.4 (-34.5)   | 0.15 (0.43) | 0.64 (0.58)                           | -17.7 (-25.3) | -32.7 (-46.7) | 22.7 (28.5) |
| SE      | 0.83 (0.74)                            | -0.05 (0.11)  | -6.0 (13.9)   | 0.10 (0.19) | 0.79 (0.74)                           | -7.2 (-18.2)  | -14.0 (-35.6) | 15.8 (22.3) |
| SW      | 0.63 (0.62)                            | -0.08 (-0.02) | -10.0 (-1.9)  | 0.17 (0.18) | 0.83 (0.82)                           | -5.7 (3.0)    | -11.8 (6.2)   | 11.7 (10.5) |
| NW      | 0.70 (0.08)                            | 0.11 (-1.13)  | 7.6 (-76.3)   | 0.46 (1.26) | 0.66 (0.38)                           | -18.9 (-4.7)  | -37.6 (-9.3)  | 25.4 (21.4) |
| Central | 0.91 (0.76)                            | -0.08 (-0.37) | -7.5 (-33.5)  | 0.18 (0.43) | 0.74 (0.70)                           | -17.9 (-14.8) | -35.3 (-29.3) | 23.7 (22.2) |

80  
81  
82  
83  
84  
85

| Province       | Region  | date                      | Measurement                                     |
|----------------|---------|---------------------------|-------------------------------------------------|
| Beijing        | NCP     | 30 <sup>th</sup> Apr 2020 | Degrade first level of response to second level |
| Tianjin        | NCP     | 30 <sup>th</sup> Apr 2020 | Degrade first level of response to second level |
| Hebei          | NCP     | 30 <sup>th</sup> Apr 2020 | Degrade first level of response to second level |
| Henan          | NCP     | 19 <sup>th</sup> Mar 2020 | Degrade first level of response to second level |
| Shandong       | NCP     | 7 <sup>th</sup> Mar 2020  | Degrade first level of response to second level |
| Inner Mongolia | NE      | 25 <sup>th</sup> Feb 2020 | Degrade first level of response to third level  |
| Jilin          | NE      | 26 <sup>th</sup> Feb 2020 | Degrade first level of response to second level |
| Liaoning       | NE      | 4 <sup>th</sup> Mar 2020  | Degrade first level of response to second level |
| Shanghai       | SE      | 24 <sup>th</sup> Mar 2020 | Degrade first level of response to second level |
| Anhui          | SE      | 25 <sup>th</sup> Feb 2020 | Degrade first level of response to second level |
| Guangdong      | SE      | 24 <sup>th</sup> Feb 2020 | Degrade first level of response to second level |
| Guangxi        | SE      | 24 <sup>th</sup> Feb 2020 | Degrade first level of response to third level  |
| Jiangsu        | SE      | 25 <sup>th</sup> Feb 2020 | Degrade first level of response to second level |
| Jiangxi        | SE      | 12 <sup>th</sup> Mar 2020 | Degrade first level of response to second level |
| Zhejiang       | SE      | 2 <sup>nd</sup> Mar 2020  | Degrade first level of response to second level |
| Hainan         | SE      | 26 <sup>th</sup> Feb 2020 | Degrade first level of response to third level  |
| Hubei          | SE      | 2 <sup>nd</sup> May 2020  | Degrade first level of response to second level |
| Hunan          | SE      | 10 <sup>th</sup> Mar 2020 | Degrade first level of response to second level |
| Fujian         | SE      | 27 <sup>th</sup> Feb 2020 | Degrade first level of response to second level |
| Yunnan         | SW      | 24 <sup>th</sup> Feb 2020 | Degrade first level of response to third level  |
| Sichuan        | SW      | 26 <sup>th</sup> Feb 2020 | Degrade first level of response to second level |
| Guizhou        | SW      | 24 <sup>th</sup> Feb 2020 | Degrade first level of response to third level  |
| Chongqing      | SW      | 10 <sup>th</sup> Mar 2020 | Degrade first level of response to second level |
| Xizang         | SW      | 7 <sup>th</sup> Mar 2020  | Degrade first level of response to third level  |
| Ningxia        | Central | 28 <sup>th</sup> Feb 2020 | Degrade first level of response to second level |
| Shanxi         | Central | 24 <sup>th</sup> Feb 2020 | Degrade first level of response to second level |
| Gansu          | Central | 21 <sup>st</sup> Feb 2020 | Degrade first level of response to third level  |
| Shanxi         | Central | 28 <sup>th</sup> Feb 2020 | Degrade first level of response to third level  |
| Qinghai        | Central | 26 <sup>th</sup> Feb 2020 | Degrade first level of response to third level  |
| Xinjiang       | NW      | 26 <sup>th</sup> Feb 2020 | Degrade first level of response to second level |



92 **Table S3. Inversion estimated emissions of different air pollutants in southeast China as well as their changes between different periods in**  
93 **COVID-19 time**

|             | NO <sub>x</sub> | PM <sub>2.5</sub> | PM <sub>10</sub> | SO <sub>2</sub> | CO     |
|-------------|-----------------|-------------------|------------------|-----------------|--------|
| P1 (Gg/day) | 57.1            | 34.8              | 60.9             | 17.9            | 876.3  |
| P2 (Gg/day) | 32.9            | 31.8              | 52.1             | 16.0            | 774.7  |
| P3 (Gg/day) | 35.9            | 34.3              | 71.0             | 17.0            | 805.2  |
| (P2-P1)/P1  | -42.4%          | -8.6%             | -14.3%           | -10.9%          | -11.6% |
| (P3-P2)/P1  | 5.2%            | 7.2%              | 31.0%            | 5.7%            | 3.5%   |
| (P3-P1)/P1  | -37.2%          | -1.4%             | 16.6%            | -5.2%           | -8.1%  |

94

95 **Table S4: Evaluation statistics for the meteorology simulation**

| Region  | U (m/s) |       |      | V (m/s) |       |      | T (°C) |       |      | RH (%) |       |      | Precipitation (mm/day) |      |      |
|---------|---------|-------|------|---------|-------|------|--------|-------|------|--------|-------|------|------------------------|------|------|
|         | R       | MBE   | RMSE | R       | MBE   | RMSE | R      | MBE   | RMSE | R      | MBE   | RMSE | R                      | MBE  | RMSE |
| NCP     | 0.92    | -0.04 | 0.72 | 0.96    | -0.38 | 1.31 | 0.98   | -0.71 | 1.07 | 0.91   | -7.95 | 9.76 | 0.88                   | 0.06 | 1.22 |
| NE      | 0.90    | 0.35  | 0.51 | 0.97    | -0.45 | 1.01 | 0.98   | -3.13 | 3.25 | 0.79   | 6.53  | 7.47 | 0.95                   | 0.20 | 0.36 |
| SE      | 0.95    | -0.32 | 0.69 | 0.96    | -0.55 | 1.07 | 0.99   | -0.21 | 0.58 | 0.96   | -5.44 | 6.80 | 0.91                   | 0.59 | 1.96 |
| SW      | 0.46    | 0.00  | 0.78 | 0.65    | 0.24  | 1.48 | 0.96   | -0.19 | 0.81 | 0.81   | -8.53 | 9.66 | 0.56                   | 0.42 | 2.38 |
| NW      | -0.01   | -0.39 | 1.27 | 0.16    | 0.16  | 0.64 | 0.96   | 2.07  | 2.60 | 0.94   | 4.71  | 6.23 | 0.86                   | 0.01 | 0.08 |
| CENTRAL | 0.92    | -0.04 | 0.72 | 0.78    | -0.26 | 0.60 | 0.94   | -0.73 | 1.42 | 0.88   | -0.40 | 6.14 | 0.91                   | 0.26 | 0.53 |

96
